## CORRECTION

# Correction: The Masters athlete in Olympic weightlifting: Training, lifestyle, health challenges, and gender differences

Marianne Huebner, David Meltzer, Wenjuan Ma, Holly Arrow

There is an error in [Table 1](#). The values in the category “Income” are incomplete. Please see the correct [Table 1](#) below.

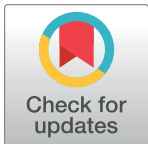

## OPEN ACCESS

**Citation:** Huebner M, Meltzer D, Ma W, Arrow H (2024) Correction: The Masters athlete in Olympic weightlifting: Training, lifestyle, health challenges, and gender differences. PLoS ONE 19(6): e0305284. <https://doi.org/10.1371/journal.pone.0305284>

**Published:** June 6, 2024

**Copyright:** © 2024 Huebner et al. This is an open access article distributed under the terms of the [Creative Commons Attribution License](#), which permits unrestricted use, distribution, and reproduction in any medium, provided the original author and source are credited.

Table 1. Demographics by gender.

|                                     | Women<br>(n = 521) | Men<br>(n = 437) | Total<br>(n = 958) |
|-------------------------------------|--------------------|------------------|--------------------|
| Age, median (range)                 | 44 (34–75)         | 46 (34–87)       | 45 (34–87)         |
| Age groups, n(%)                    |                    |                  |                    |
| 35–39                               | 159 (30.5%)        | 116 (26.5%)      | 275 (28.7%)        |
| 40–44                               | 111 (21.3%)        | 68 (15.6%)       | 179 (18.7%)        |
| 45–49                               | 74 (14.2%)         | 79 (18.1%)       | 153 (16.0%)        |
| 50–54                               | 77 (14.8%)         | 50 (11.4%)       | 127 (13.3%)        |
| 55–59                               | 49 (9.4%)          | 39 (8.9%)        | 88 (9.2%)          |
| 60–64                               | 35 (6.7%)          | 29 (6.6%)        | 64 (6.7%)          |
| 65–69                               | 11 (2.1%)          | 22 (5.0%)        | 33 (3.4%)          |
| 70–74                               | 4 (0.8%)           | 18 (4.1%)        | 22 (2.3%)          |
| 75–79                               | 1 (0.2%)           | 10 (2.3%)        | 11 (1.1%)          |
| 80+                                 | 0 (0.0%)           | 6 (1.4%)         | 6 (0.6%)           |
| Marital Status, n(%)                |                    |                  |                    |
| Married                             | 339 (65.6%)        | 343 (78.7%)      | 682 (71.6%)        |
| Divorced/widowed/separated          | 74 (14.4%)         | 35 (8.0%)        | 109 (11.4%)        |
| Not married                         | 104 (20.1%)        | 58 (13.3%)       | 162 (17.0%)        |
| missing                             | 4                  | 1                | 5                  |
| Race, n(%)                          |                    |                  |                    |
| White/Caucasian                     | 425 (82.5%)        | 369 (85.6%)      | 794 (83.9%)        |
| Black or African American           | 19 (3.7%)          | 10 (2.3%)        | 29 (3.1%)          |
| Asian                               | 25 (4.9%)          | 20 (4.6%)        | 45 (4.8%)          |
| Native Hawaiian or Pacific Islander | 6 (1.2%)           | 5 (1.2%)         | 11 (1.2%)          |
| American Indian or Alaska Native    | 1 (0.2%)           | 1 (0.2%)         | 2 (0.2%)           |
| Multiple + other                    | 39 (7.5%)          | 26 (5.9%)        | 65 (6.8%)          |
| Missing/Decline to answer           | 6                  | 6                | 12                 |
| Hispanic, yes (%)                   | 46 (8.9%)          | 34 (7.8%)        | 80 (8.4%)          |
| Missing/Decline to answer           | 3                  | 2                | 5                  |
| Income, n(%)                        |                    |                  |                    |
| <\$100,000                          | 165 (33.7%)        | 131 (31.4%)      | 296 (32.7%)        |
| \$100,000-\$149,000                 | 110 (22.5%)        | 110 (26.3%)      | 220 (24.3%)        |
| \$150,000 - \$200,000               | 73 (14.9%)         | 71 (17.0%)       | 144 (15.9%)        |
| >\$200,000                          | 99 (20.2%)         | 87 (20.8%)       | 186 (20.5%)        |
| Decline to Answer                   | 42 (8.6%)          | 19 (4.5%)        | 61 (6.7%)          |
| Missing                             | 32                 | 19               | 51                 |
| Employment, n(%)                    |                    |                  |                    |
| Full-time                           | 409 (78.7%)        | 359 (82.5%)      | 768 (80.4%)        |
| Part-time                           | 67 (12.9%)         | 26 (6.0%)        | 93 (9.7%)          |
| Retired                             | 28 (5.4%)          | 41 (9.4%)        | 69 (7.2%)          |
| Unemployed                          | 16 (3.1%)          | 9 (2.1%)         | 25 (2.6%)          |
| Missing/Decline to answer           | 1                  | 2                | 3                  |
| Education, n(%)                     |                    |                  |                    |
| High school/GED or less             | 14 (2.6%)          | 17 (3.9%)        | 31 (3.2%)          |
| Some college                        | 64 (12.3%)         | 79 (18.1%)       | 143 (14.9%)        |
| College degree                      | 165 (31.7%)        | 162 (37.1%)      | 327 (34.1%)        |
| Some graduate school                | 35 (6.7%)          | 20 (4.6%)        | 55 (5.7%)          |
| Graduate school                     | 243 (46.6%)        | 159 (36.4%)      | 402 (42.0%)        |

<https://doi.org/10.1371/journal.pone.0305284.t001>

## Reference

1. Huebner M, Meltzer D, Ma W, Arrow H (2020) The Masters athlete in Olympic weightlifting: Training, lifestyle, health challenges, and gender differences. PLoS ONE 15(12): e0243652. <https://doi.org/10.1371/journal.pone.0243652> PMID: 33275639
